# Supplementary material
Source: ML conference proceedings conference paper supplement (https://openreview.net/forum?id=NDYDDxAS9Z)
Supplement: supplementary_material [file attachment]

**Algorithm 1:** The pseudo code of in DI-MML.

**Input:** Input data  $\mathcal{D} = \{x_i^1, x_i^2, y_i\}_{i=1,2,\dots,N}$ , initialized encoders  $\phi^1, \phi^2$ , classifiers  $\psi^1, \psi^2$ , and  $\psi^s$ , and fusion module  $\psi^f$ . Hyper-parameters  $\lambda_s, \lambda_D$ , epoch number  $E$ , warmup epoch number  $E_w$ , fusion epoch  $E_f$ .

```

1  int e=0;
2  Encoder training:
3  while  $e < E$  do
4      if  $e = E_m$  then
5          Calculate the dimension-wise prediction using Eq. 4,
6          obtain effective and ineffective dimensions using Eq.
          5 (can perform only once)
7      end
8      foreach mini-batch data  $B_t$  in  $\mathcal{D}$  at step  $t$  do
9          if  $e < E_m$  then
10             Calculate the loss  $\mathcal{L}^i = \mathcal{L}_{CE}^i + \lambda_s \mathcal{L}_{CE}^{Si}$ 
11          else
12             Calculate the final loss  $\mathcal{L}^i$  with Eq. 7
13          end
14          Update networks  $\phi^1, \phi^2, \psi^1, \psi^2, \psi^s$  for different
          modalities with  $\mathcal{L}^i$ .
15      end
16       $e=e+1$ ;
17 end
18 Fusion module training::
19 while  $e < E_f$  do
20     Freeze  $\phi^1, \phi^2$  and update  $\psi^f$  according to  $\mathcal{L}_{CE}^f$ .
21 end

```

**A BASELINES**

In this paper, we compare our method with eight multimodal baselines and we give the description of them below.

**Joint training:** Joint training is the most basic multimodal training framework with concatenation fusion on the extracted features

from different modalities and then input into a linear classifier while the network is trained with the cross-entropy loss.

**MSES:** Modality-Specific Early Stop (MSES) [9] restrain the decrease in overall accuracy of the model by detecting the occurrence of overfitting in each modality and individually controlling the learning process. The detected overfitted modality will be stopped first.

**MSLR:** Modality-Specific Learning Rate (MSLR) [41] uses different learning rates for different modalities while training an additive late-fusion model. It contains “Keep”, “Smooth” and “Dynamic” strategies and in this paper we compare with its “Dynamic” strategy because of its better performance.

**OGM-GE:** On-the-fly Gradient Modulation (OGM-GE) [22] dynamically controls the optimization of each modality based on their contribution to the learning objective. By monitoring and adapting the gradients, the method aims to address the imbalance problem without the need for additional neural modules.

**PMR:** Prototypical Modal Rebalance (PMR) [8] focuses on stimulating the slow-learning modality without interference from other modalities. Using prototypes could help to regulate the learning directions and paces of modality-specific gradient.

**UMT:** Unimodal Teacher (UMT) [6] distills the pre-trained unimodal features to the corresponding parts in multi-modal networks in multi-modal training. Uni-modal distillation happens before fusion, so it’s suitable for late-fusion multi-modal architecture. The pre-trained uni-modal features are generated by inputting the data to the pre-trained uni-modal models.

**MM Clf and Preds Avg:** They are as described in Section 3.1.

**B TRAINING SCHEME**

The details of training scheme is shown here as well as the pseudo code. The randomly initialized neural networks perform worse and cannot be used to identify the informative dimensions. Therefore, we perform unimodal training independently with unimodal cross-entropy loss for some warmup epochs (10 in our experiments). And then, the shared classifier and DUC loss are applied for the left encoder training epochs. After encoder training, we fix the parameters of encoders and train a linear fusion classifier by concating multimodal features.
